# Supplementary material for: What Are the Key Soil Hydrological Processes to Control Soil Moisture Memory?
Source: Copernicus journal article supplement (doi:10.5194/egusphere-2024-1256), 2024-05-17
Supplement: Supplementary file 1 [file egusphere-2024-1256-supplement.pdf]

## Supporting Materials

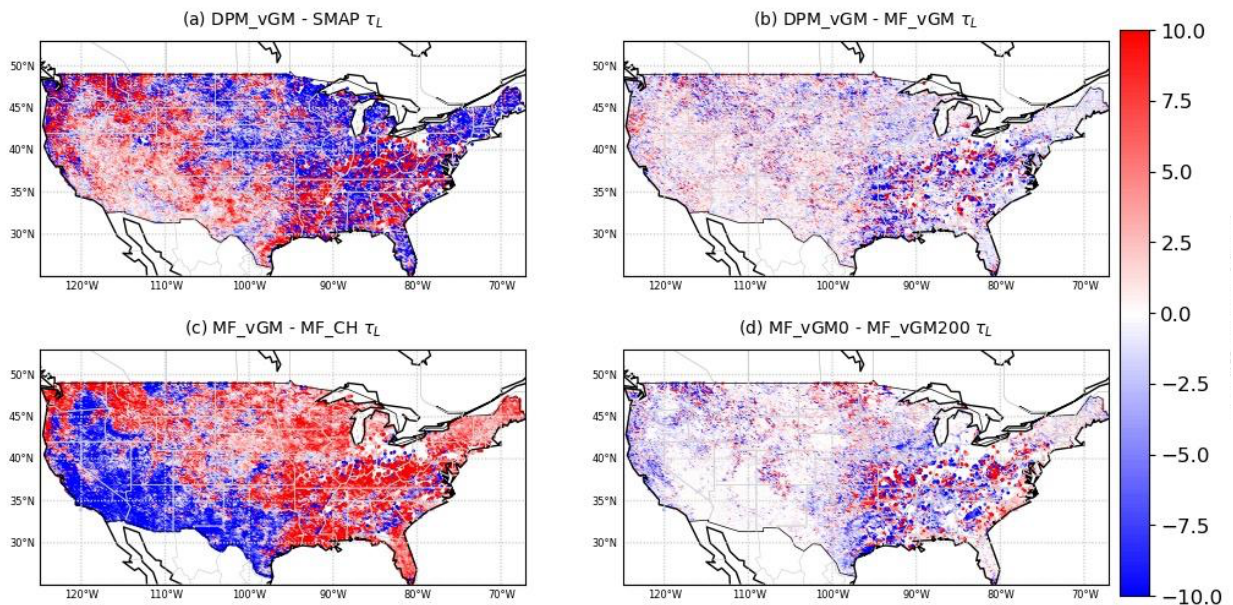

Figure S1 Spatial distribution of long-term memory differences (a) between the Dual-Permeability model and SMAP; (b) between the Dual-Permeability and Mixed-Richards models; (c) between the Mixed-Richards models using Van-Genuchten and Clapp-Hornberger parameterizations; and (d) between the Mixed-Richards models with zero and 200 mm ponding depths.

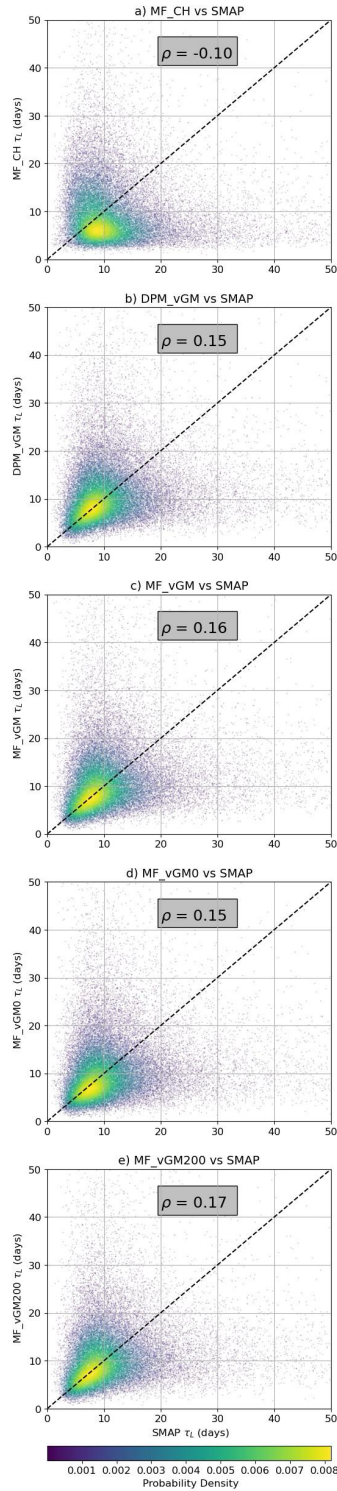

Figure S2 Scatterplot of root zone  $\tau_L$  estimated from SMAP versus (a) MF\_CH; (b) DPM\_VGM; (c) MF\_VGM; (d) MF\_VGM0; and (e) MF\_VGM200.

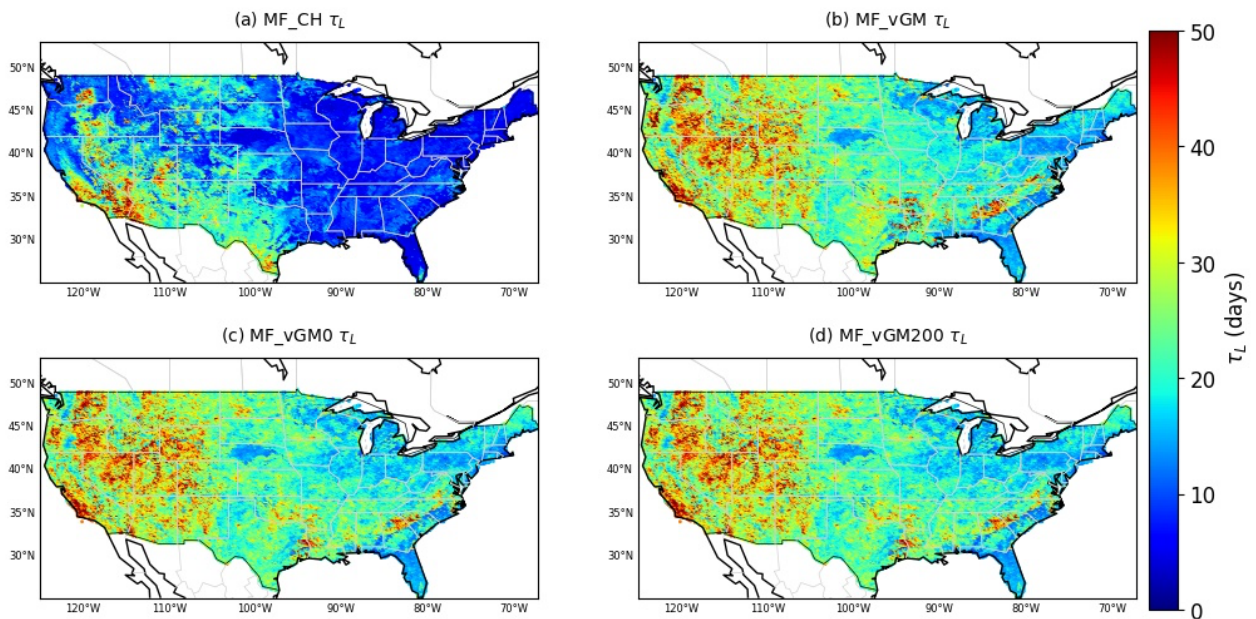

Figure S3 Spatial distribution of root zone  $\tau_L$  estimated from (a) MF\_CH (b) MF\_vGM; (c) MF\_vGM0; and (d) MF\_vGM200.

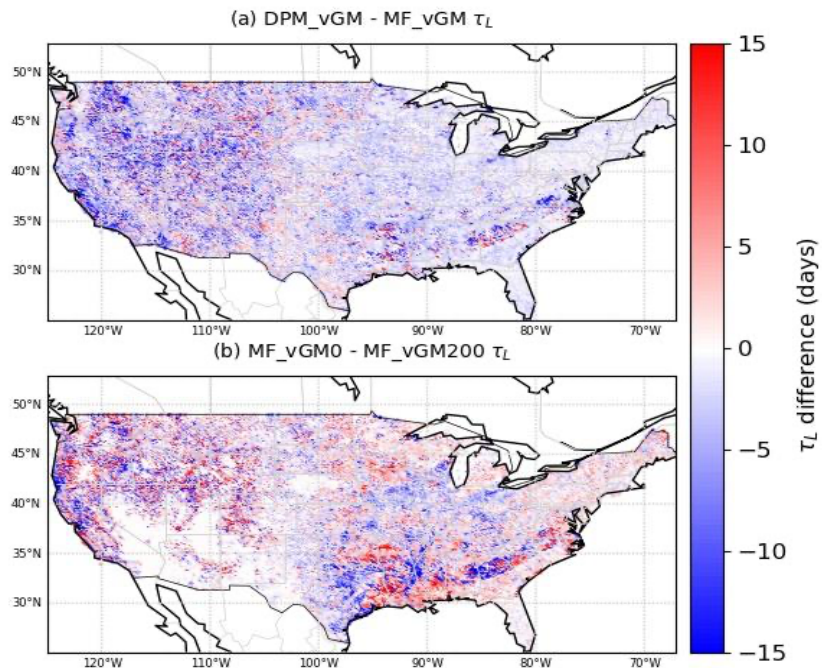

Figure S4 Spatial distribution of root zone long-term memory differences (a) between the Dual-Permeability and Mixed-Richards models; (b) within the Mixed-Richards models contrasting zero ponding depth to a 200 mm ponding depth.

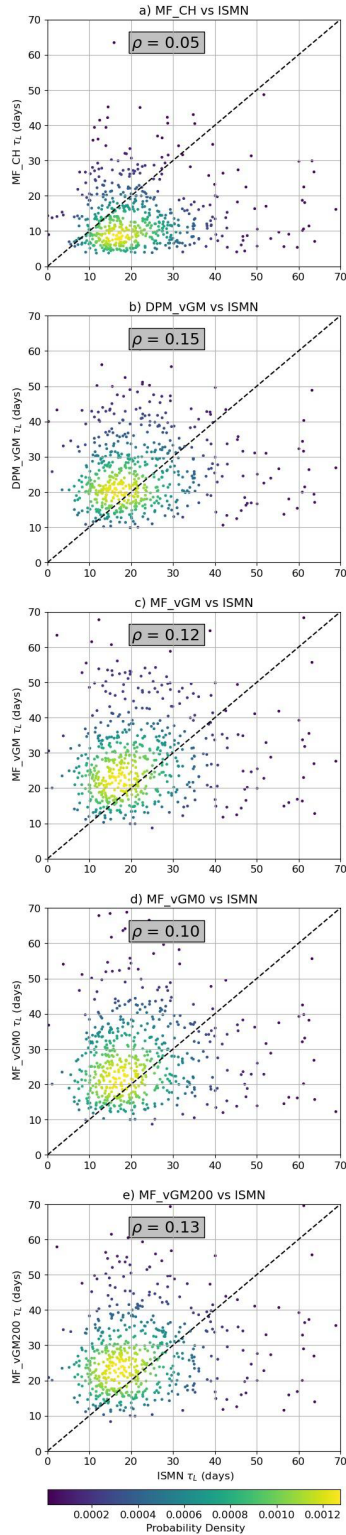

Figure S5 Scatterplot of root zone  $\tau_L$  estimated from SMAP versus (a) MF\_CH; (b) DPM\_vGM; (c) MF\_vGM; (d) MF\_vGM0; and (e) MF\_vGM200.



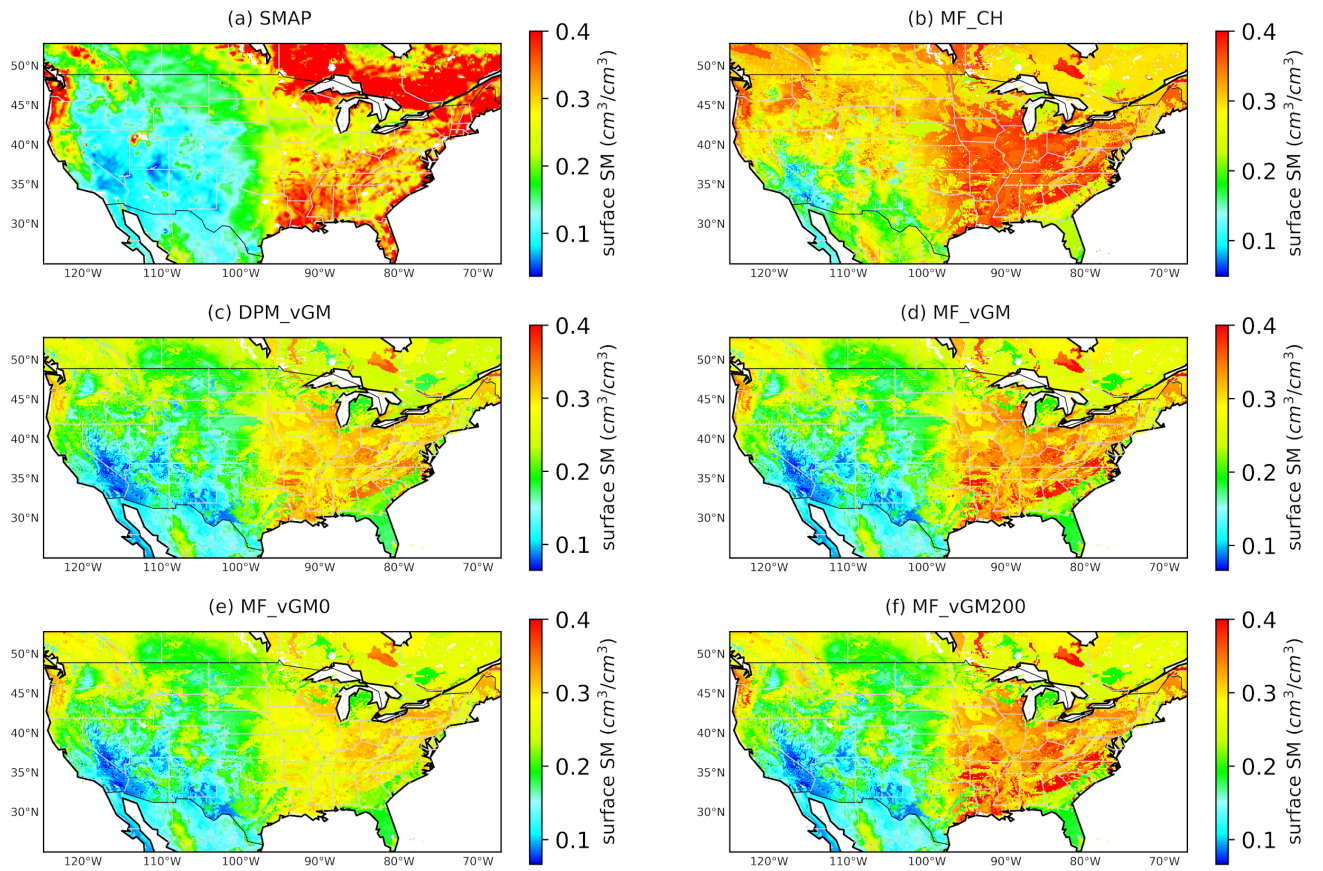

Figure S6 Average surface soil moisture over 2015–2019: (a) SMAP; (b) MF\_CH; (c) DPM\_vGM; (d) MF\_vGM; (e) MF\_vGM0; and (f) MF\_vGM200

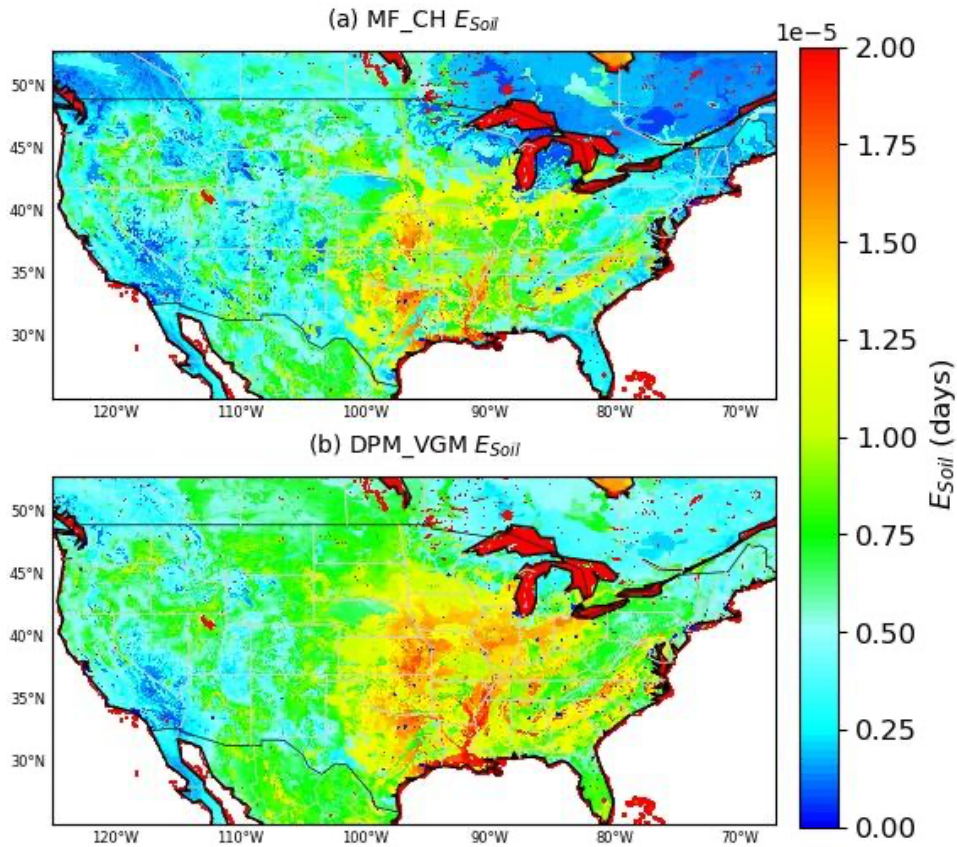

Figure S7 Spatial distribution of surface soil evaporation of (a) MF\_CH; and (b) DPM\_VGM.

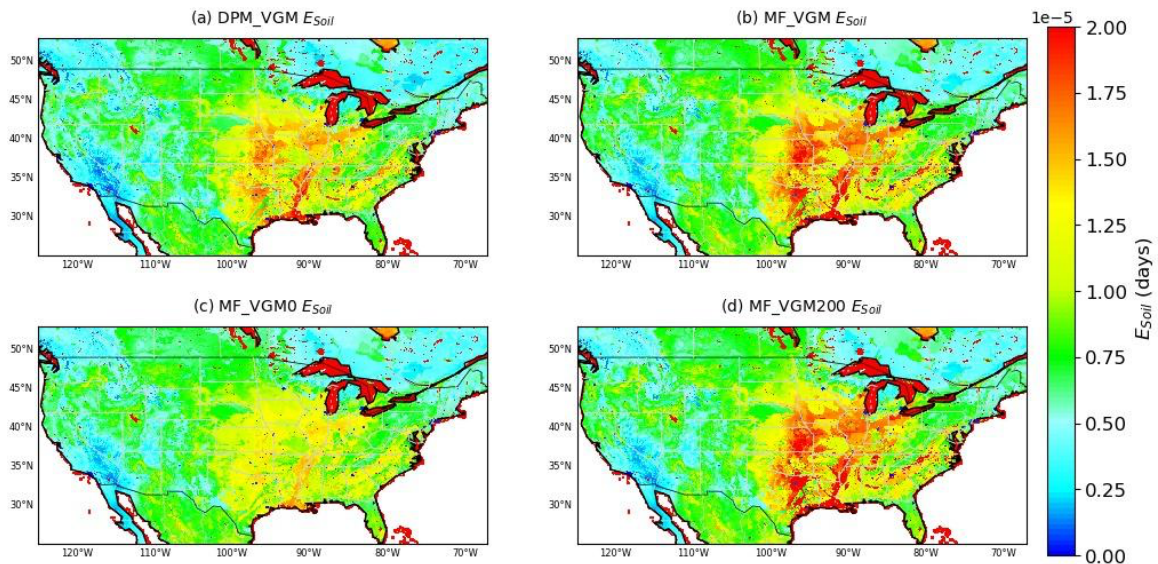

Figure S8: Spatial distribution of surface soil evaporation of (a) DPM\_VGM; (b) MF\_VGM; (c) MF\_VGM0; and (d) MF\_VGM200.
